---

# LANGUAGE PROCESSING IN BRAINS AND DEEP NEURAL NETWORKS: COMPUTATIONAL CONVERGENCE AND ITS LIMITS

---

A PREPRINT

**Charlotte Caucheteux**  
Facebook AI Research

**Jean-Rémi King**  
PSL University, CNRS  
Facebook AI Research

December 20, 2020

## ABSTRACT

1 Deep Learning has recently led to major advances in natural language processing. Do these models  
2 process sentences similarly to humans, and is this similarity driven by specific principles? Using a  
3 variety of artificial neural networks, trained on image classification, word embedding, or language  
4 modeling, we evaluate whether their architectural and functional properties lead them to generate  
5 activations linearly comparable to those of 102 human brains measured with functional magnetic  
6 resonance imaging (fMRI) and magnetoencephalography (MEG). We show that image, word and  
7 contextualized word embeddings separate the hierarchical levels of language processing in the brain.  
8 Critically, we compare 3,600 embeddings in their ability to linearly map onto these brain responses.  
9 The results show that (1) the position of the layer in the network and (2) the ability of the network to  
10 accurately predict words from context are the main factors responsible for the emergence of brain-like  
11 representations in artificial neural networks. Together, these results show how perceptual, lexical  
12 and compositional representations precisely unfold within each cortical region and contribute to  
13 uncovering the governing principles of language processing in brains and algorithms.

14 **Keywords** Natural Language Processing | Encoding | Functional Magnetic Resonance Imaging | Magneto-  
15 encephalography

## 16 1 Introduction

17 Convergent evolution – when distantly related species (e.g. bats and birds) develop similar structures or functions (i.e.  
18 wings) – is often critical to reveal the principles that guide the variety life forms (i.e. controlling aerodynamics with  
19 minimal energy). Convergence can be investigated in artificial agents too: "deep" artificial neural networks have recently  
20 made substantial progress in harnessing abilities considered uniquely human (4; 5; 6). In language, in particular, deep  
21 nets demonstrate unprecedented completion, translation, and summarization abilities (7; 8; 9; 10). Do these algorithms  
22 process language similarly to the human brain? Does this similarity directly depend on their training? In sum, is there,  
23 in the domain of language processing, a computational convergence between brains and deep neural networks?

24 These questions are all-the-more challenging that the neurobiology of language remains in its infancy. Previous studies  
25 showed that reading depends on a cortical hierarchy originating in the primary visual cortex (V1), propagating within  
26 the visual word form area (in the fusiform gyrus, where letter strings are recognized) and reaching the angular gyrus,  
27 the anterior temporal lobe and the middle temporal gyrus – associated with lexical understanding (11; 12; 13; 14; 15).  
28 This hierarchical pathway and a parallel motor route (13) together connect to the inferior frontal gyrus, where Broca  
29 area presumably performs key compositions, like syntax (12; 13; 16; 17; 18). However, the precise nature, format, and  
30 dynamics of such lexical and compositional representations is still unclear (18; 19; 13)

31 This challenge has been partly addressed with Natural Language Processing (NLP) algorithms. For example, word  
32 embeddings – high dimensional dense vectors shaped to predict the average lexical neighborhood (20; 21; 22; 23) – have  
33 been shown to linearly correlate with the brain responses elicited by words presented either in isolation (24; 25; 26) or

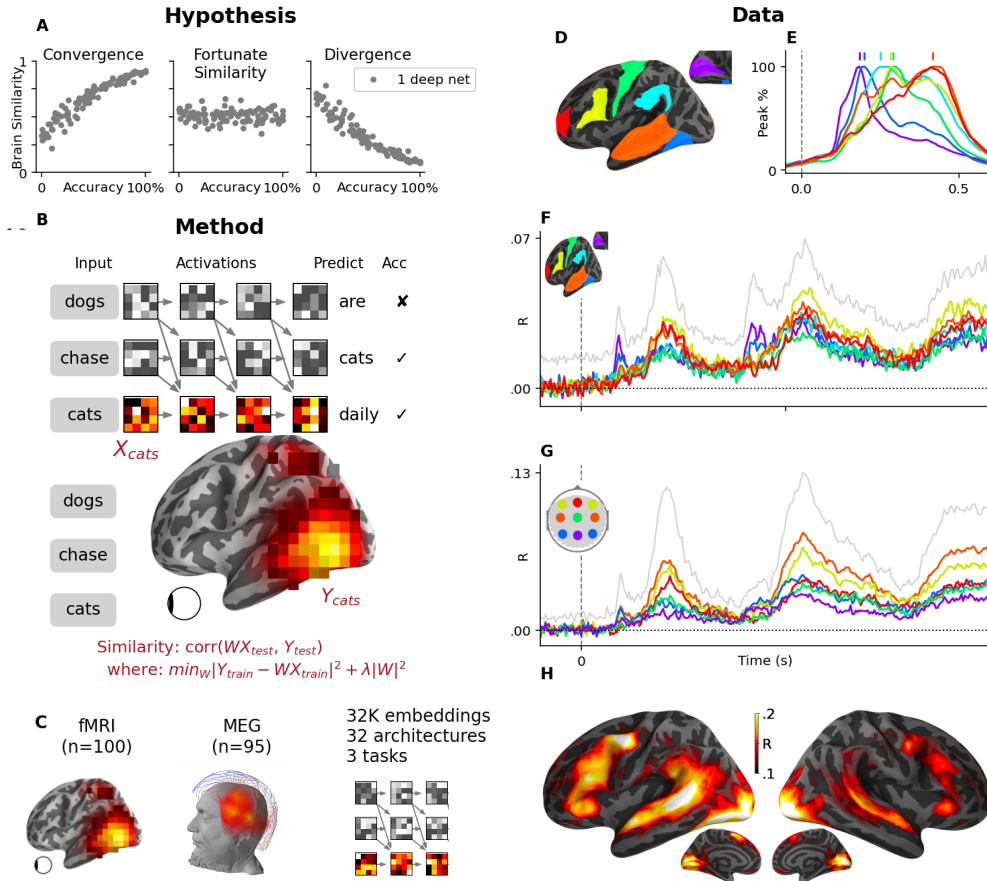

**Figure 1: Testing the convergence hypothesis between artificial neural networks and the human brain** **A.** Artificial neural networks would be considered to *converge* to brain-like computations if and only if training consistently increases the similarity between their activations and those of the brain, when input with the same stimuli. Such similarity may be observed, because high dimensional embeddings can contain relevant components by chance (1; 2). Each dot, in the panels, represents one hypothetical embedding: i.e. the activations of a single neural network trained with a fixed amount of data. **B.** The network depicts a 4-layer causal transformer trained to predict words from a preceding context. The similarity between such transformer and the brain is assessed with a linear regression  $W$  (1) predicting brain responses  $Y$  from the model’s activations ( $X$  in response to the same stimuli and (2) evaluated with a correlation between the predictions and true brain responses to held-out sentences  $Y_{test}$  (3). **C.** Using 100 fMRI recordings and 95 MEG recordings, we compare 32,400 embeddings, derived from 32 architectures trained on 3 distinct tasks and evaluated on 100 training steps. **D.** Grand average MEG source estimates to word onset ( $t=0$ ) for 7 regions typically associated with reading (V1: purple, M1: green, fusiform gyrus: dark blue, supramarginal gyrus: light blue, superior temporal gyrus: orange, infero-frontal gyrus: yellow and fronto-polar gyrus: red), normalized to their peak response. Vertical bars indicate the peak time of each region. The full (not normalized) data is displayed in Video 1. **E.** MEG noise ceilings, approximated by predicting brain responses of a given subject from those of all other subjects. Colored lines depict the mean noise ceiling in each region of interest. The grey line depicts the best noise ceiling across sources. **F.** Same as (D) in sensor space. **G.** Noise ceiling estimates of fMRI recordings.

34 within narratives (27; 28; 29; 30; 31; 32). More recently, *contextualized* word embeddings improved such correlations,  
 35 especially in the prefrontal, temporal and parietal cortices (33; 34; 35).

36 However, these studies focused on a handful of heterogeneous pretrained models, typically varying in dimensionality,  
 37 architecture, training objective and corpora. Yet, random embeddings can capture relevant dimensions (1; 2), and  
 38 consequently lead a network to significantly correlate with brain activity. Consequently, it is unclear whether deep  
 39 neural networks trained on language modeling systematically (1) converge to, (2) anecdotally correlate with, or (3) even  
 40 diverge away from brain representations during their training (Figure 1 A).

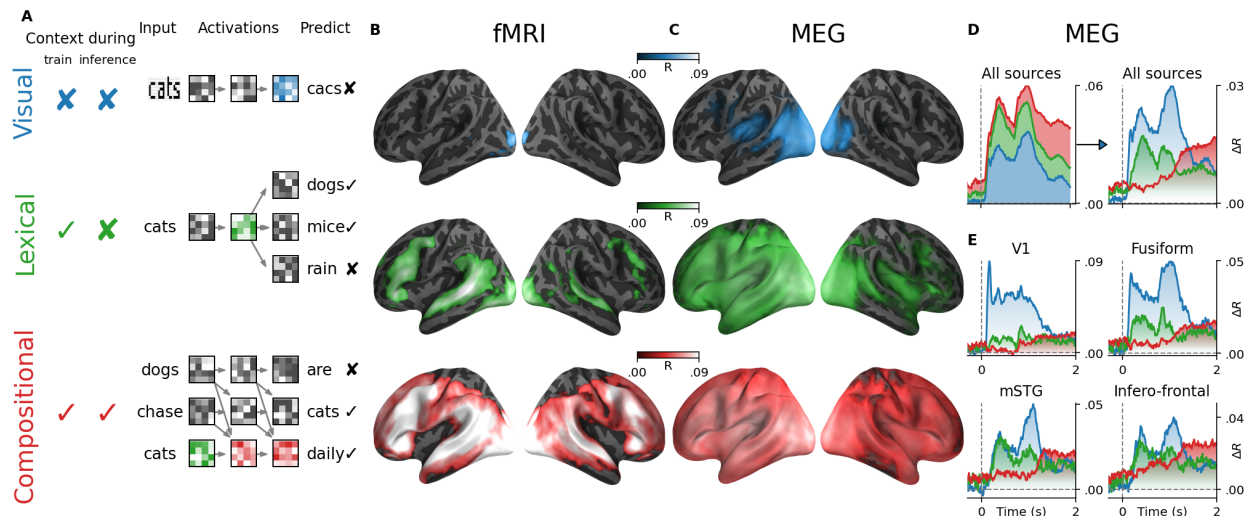

Figure 2: **Encoding of hierarchical representations** **A.** Visual, lexical, and compositional representations can be isolated from a convolutional neural networks trained on character recognition (top, blue), a word embedding (middle, green) and the middle layer of a transformer trained on language modeling (bottom red), because each of these embeddings accesses word context variably during training and/or inference. **B.** Mean (across subjects) fMRI encoding scores obtained with the convolutional neural network (top, blue), the word embedding (middle, green) and the transformer (bottom, red). **C.** Mean MEG encoding scores averaged across all time samples. **D.** Mean MEG encoding scores averaged across all sensors (left) and the corresponding gains (i.e. green: [word embedding] - [visual embedding]; red: [compositional embedding] - [word embedding]). **E.** Mean gains in MEG encoding scores averaged within four regions of interest. For a whole-brain depiction of the gains in encoding scores, see Video 2. Shaded regions highlight significant scores across subjects ( $p < 10^{-2}$  after FDR correction).

41 Here, we evaluate whether the activations of 3,600 neural network embeddings linearly correlate with functional  
 42 magnetic resonance imaging (fMRI) and source-localized magneto-encephalography (MEG) of 102 subjects reading  
 43 400 distinct and isolated sentences (36). We then evaluate how each functional and architectural properties of the  
 44 networks predict their similarity with brain responses.

45 Our study provides three main contributions. First, we confirm that pretrained neural networks, and their middle layers  
 46 in particular, linearly correlate with a variety of brain responses to words, even when those are presented within isolated  
 47 sentences. Second, we show how these networks help track and isolate the sequential generation of perceptual, lexical  
 48 and compositional representations within each of these cortical regions. Finally, we show that the convergence of deep  
 49 language models towards brain-like responses is (1) limited to specific layers and (2) predominantly driven by their  
 50 ability to accurately predict words from context.

## 51 2 Results

### 52 2.1 Average and single-trial fMRI and MEG responses to reading

53 We first aim to identify where and when cortical neurons are activated during a reading task. As expected (18; 12; 37; 13),  
 54 the rapid serial visual presentation of words elicited responses in a distributed bilateral network, including the primary  
 55 visual cortex, the left fusiform gyrus, the supra marginal and superior temporal cortices, as well as the motor, premotor  
 56 and infero-frontal areas (Figure 1). MEG source reconstruction further clarifies the dynamics of this network: on  
 57 average, word onset elicited a sequence of brain responses originating in V1 around  $\approx 100$  ms and continuing within  
 58 the left posterior fusiform gyrus around 200 ms, the superior and middle temporal gyri, as well as the pre-motor and  
 59 infero-frontal cortices between 150 and 500 ms after word onset (Figure 1, Video 1).

60 What proportion of these brain responses can be accounted for by the specific content and form of each word in  
 61 each sentence? To address this issue, we trained, for each subject separately, a "noise-ceiling" model across subjects.  
 62 Specifically, for each recording of each subject and each sentence  $Y_{train}$ , we trained a linear model  $W$  from the  
 63 recordings of all other subjects who read the same sentence  $X_{train}$ . Using a cross-validation scheme across sentences,  
 64 we then evaluated the Pearson correlation  $R$  between (1) the true brain responses of subject  $Y_{test}$  and (2) the predicted

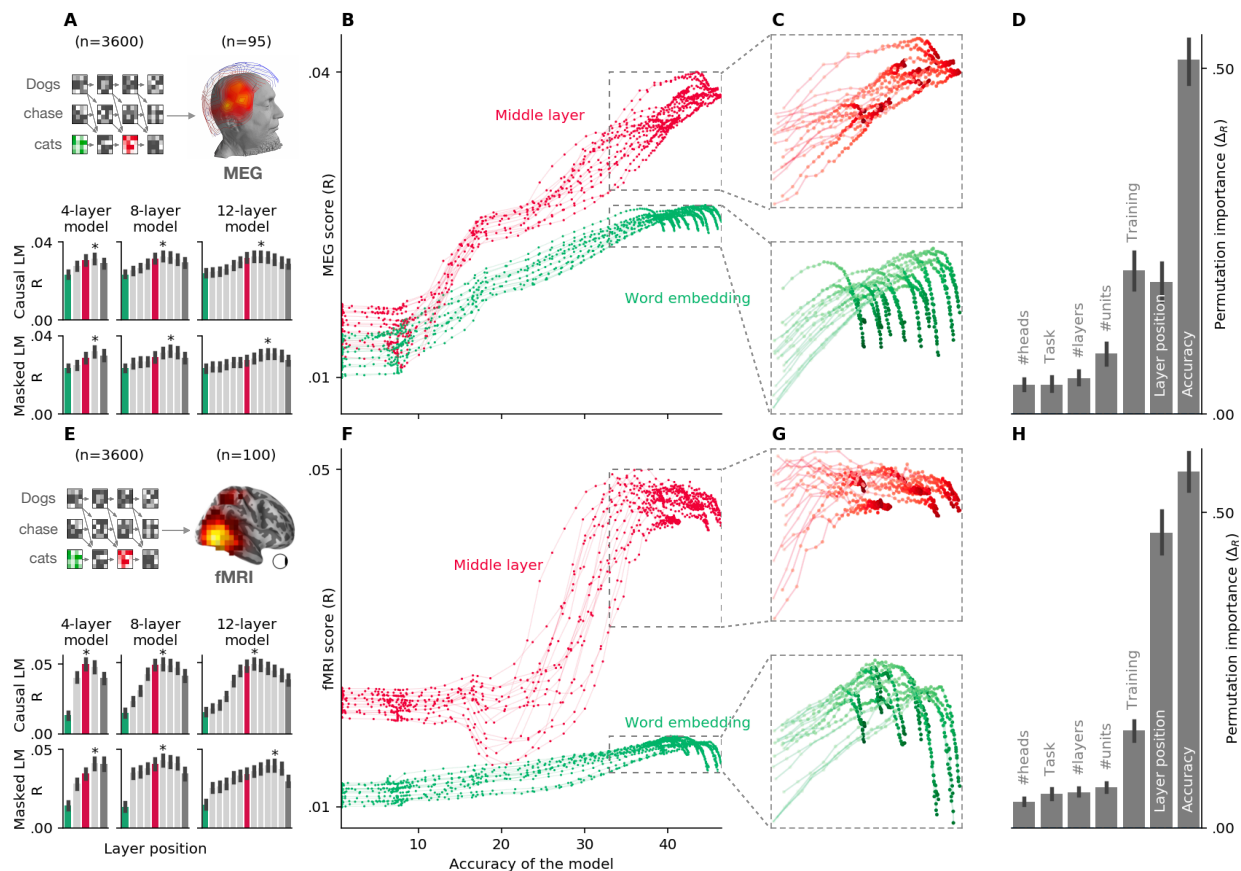

**Figure 3: Only middle layers of language models consistently converge to brain representations.** **A.** Bar plots display the MEG encoding score (averaged across time and channels) of 6 representative transformers varying in tasks (CLM vs MLM) and depth (4-12 layers). The green and red bars correspond to the word-embedding and the best layers respectively. **B.** MEG scores (mean across subjects, time and channels) of each of the 16,200 embeddings extracted from 1,800 causal deep networks (dots), separately for the input layer (word embedding,  $l = 0$ , green) and the middle layer (red). On the x-axis, the network’s language modeling performance (top-1 accuracy to predict the next word). Each line corresponds to one architecture. Each dot correspond to their embedding extracted at a specific training step. **D.** Same as (C), zooming on the best-performing neural networks (accuracy > 35). **E.** Results of the feature importance analysis. Each bar indicates how much each model variable contributes to making the activations of the artificial neural network similar to the MEG responses (cf. Methods). **F-J.** Same as above, but the brain-score is evaluated on the fMRI recordings of subjects (as opposed to the MEG recordings). Error bars are the 95% confidence intervals of the scores’ distribution across subjects.

65 brain responses  $\hat{Y}_{test} = W \cdot X_{test}$ . This procedure could be thought of as approximating an optimal black box: a  
 66 one-hot encoder of brain responses is fitted to each element of a unique sentence. The results are summarized in Figure  
 67 1 F-H. As expected, noise ceiling estimates peaked within the well-known language network (38) were substantially  
 68 lower in MEG (especially in source space) than in fMRI. For example, fMRI noise ceilings reached, on average,  
 69  $R = 0.129 (\pm 0.004 \text{ SEM across subjects})$  in the superior temporal gyrus whereas MEG noise ceilings peaked at  
 70  $R = 0.069 \pm 0.001$ .

## 71 2.2 Image, word and compositional embeddings correlate with different parts of brain activity

72 Following previous studies (39; 40; 41; 3; 26; 27; 28; 29; 31; 33; 34; 35; 18), we evaluated whether the activations of  
 73 (1) a visual neural network, (2) a word embedding and (3) a contextualized word embedding can linearly predict MEG  
 74 and fMRI responses to words presented in isolated sentences.

75 For the image embedding, we input an image of each word to a deep convolutional neural network (CNN) trained on  
 76 character recognition (42) and extracted the activations of the last layer. Similarly, we input the sentences that the

77 subjects read to a 13-layer transformer trained on language modeling and extracted the 128-dimensional activations of  
78 the first and middle layers to retrieve word and compositional embeddings, respectively.

79 For each embedding  $X$ , we trained and evaluated with cross-validation, the ability of a linear mapping  $W$  to predict  
80 brain responses  $Y$ . Figure 2 and Video 2 summarize the corresponding MEG and fMRI correlation scores. For clarity,  
81 Figure 2C and the video plot the gain in MEG scores obtained by word embeddings (compared to visual embeddings)  
82 and by compositional embeddings (compared to word embeddings).

83 The brain scores of image embedding peaked in the early visual cortex (V1), both for fMRI ( $R = 0.022 \pm 0.003, p <$   
84  $10^{-11}$  across subjects) and MEG source estimates ( $R = 0.008 \pm 0.002, p < 10^{-3}$ , for  $t=100$ ms). These MEG  
85 scores peaked around 100 ms in V1, and rapidly propagated to higher-level areas. Word embeddings peaked around  
86 400 ms and were primarily distributed over the left temporal ( $R = 0.052 \pm 0.004, p < 10^{-13}$ ) and frontal cortices  
87 ( $R = 0.053 \pm 0.003, p < 10^{-15}$ ). Finally, compositional embeddings mainly improved brain scores in the superior  
88 temporal gyrus ( $\Delta_R = 0.012 \pm 0.001, p < 10^{-16}$ ), the angular gyrus ( $\Delta_R = 0.010 \pm 0.001, p < 10^{-16}$ ), the  
89 infero-frontal cortex ( $\Delta_R = 0.016 \pm 0.001, p < 10^{-16}$ ) and the dorsolateral prefrontal cortex ( $\Delta_R = 0.012 \pm 0.001,$   
90  $p < 10^{-13}$ ). These effects were mostly lateralized (between left and right,  $\Delta_R = 0.010 \pm 0.001, p < 10^{-14}$ ). The  
91 gain in MEG-scores obtained with compositional embeddings appears to be mainly driven by brain responses after  $\approx$   
92 1sec, and is observed in a large number of bilateral brain regions (Figure ??C-D).

93 Around this time window, brain areas outside the language network, such as area V1, appeared to be better predicted by  
94 word and compositional embeddings than by visual ones (e.g between visual and word in V1:  $\Delta_R = 0.016 \pm 0.002,$   
95  $p < 10^{-10}$ ). These effects could thus reflect feedback activity (43) and explain why the corresponding fMRI responses  
96 are better accounted for by word and compositional embeddings than by visual ones.

97 Overall, these results confirm that the activations of three typical deep neural networks trained on image, word or  
98 sentence processing linearly mapped onto brain responses to the same input. In addition, these results allow us to  
99 track, with an unprecedented spatio-temporal precision, the hierarchical generation of visual, lexical and compositional  
100 representations in each cortical region (Video 2).

### 101 2.3 The middle layers of trained language models best predict brain responses independently of their tasks 102 and architectures

103 To what extent are the above correlations representative of the similarity between brains and deep neural networks  
104 used in natural language processing? To address this issue, we analysed a variety of Transformers – state-of-the-art  
105 feedforward networks that rely on an attention mechanism to combine words into meaning (7; 8). Specifically, we  
106 implemented 32 architectures (from 4 to 12 layers, each varying from 128 to 512 dimensions, and each benefiting from  
107 4 to 8 attention heads), trained each of them on two distinct tasks ("causal" language modeling or "masked" language  
108 modeling), assessed the extent to which their activations linearly predicted fMRI and MEG responses, and evaluated  
109 how their architectural and functional properties impacted the brain scores.

110 Brain scores mainly varied as a function of the relative position of each extracted layer (Figure. 3). Specifically, middle  
111 layers systematically outperformed output (fMRI:  $\Delta_R = 0.011 \pm 0.001, p < 10^{-18}$ , MEG:  $\Delta_R = 0.003 \pm 0.000,$   
112  $p < 10^{-13}$ ) and input layers (fMRI:  $\Delta_R = 0.031 \pm 0.001, p < 10^{-18}$ , MEG:  $\Delta_R = 0.009 \pm 0.001, p < 10^{-17}$ ).  
113 This effect was consistent across 32 architectures and two training tasks, cf. Figure 3.

114 To assess how each model property explained brain scores, we implemented a permutation importance analysis across  
115 models with a random forest ((44)), for each subject independently (cf. Methods for more details). Overall, the relative  
116 position of the layers explained  $81.5 \pm 1.2\%$  of fMRI and  $70.2 \pm 1.4\%$  of MEG scores, whereas architecture and task  
117 variables accounted for less than 17% of them. In sum, this analysis confirms that the results described in section 2.2  
118 are representative of language models.

### 119 2.4 Only middle layers converge towards brain responses

120 The above similarities between brain responses and artificial neural networks result from the analysis of trained networks.  
121 Yet, random neural networks can contain relevant features (1; 2), and can thus significantly predict brain responses.  
122 To test whether training leads neural networks to (1) converge to, (2) fortunately correlate with or even (3) diverge  
123 away from brain-like solution, we applied brain score analyses for each artificial neural network frozen at 100 different  
124 training steps. We then tested whether the similarity between their activations and brain responses consistently increased  
125 with their training and language performance (top-1 accuracy at predicting the masked/next word on a test set).

126 On average, the input layer activations (word embeddings) increased within the 100K first training iterations ( $\approx 200M$   
127 processed words, one iteration corresponds to one gradient update). However, training ultimately led to a steady decrease,

128 even though the networks continued to improve on their training task (Figure 3): the Pearson correlation between  
129 training steps and brain scores after 100K iterations was negative both in MEG ( $R = -0.166 \pm 0.019, p < 10^{-10}$ ) and  
130 in fMRI ( $R = -0.106 \pm 0.021, p < 10^{-4}$ ).

131 By contrast, the brain scores of the middle layer (Figure 3) increased with the language modeling accuracy in MEG  
132 ( $R = 0.87 \pm 0.01, p < 10^{-16}$ ), Figure 3) and fMRI ( $R = 0.82 \pm 0.02, p < 10^{-17}$ ). Note that the brain scores of the  
133 middle layers stabilized in fMRI slightly before MEG.

134 Language modeling accuracy varies with other model properties, such as architecture and training parameters. To  
135 disentangle how each property contributes to making the model activation more-or-less similar to the brain, we  
136 implemented a feature importance analysis for each subject independently (Figure 3 D, H). The results confirmed  
137 that language modeling accuracy was the most important factor that leads the network to brain-like solutions: fMRI:  
138  $\Delta R = 0.56 \pm 0.02$ , MEG:  $\Delta R = 0.51 \pm 0.02$ . This variable was followed in its brain-like contribution by the amount  
139 of training the network underwent (fMRI:  $\Delta R = 0.15 \pm 0.01$ , MEG:  $\Delta R = 0.21 \pm 0.01$ ) and the relative layer  
140 position of the extracted representation (fMRI:  $\Delta R = 0.47 \pm 0.02$ , MEG:  $\Delta R = 0.19 \pm 0.01$ , Figure 3 D and H).  
141 By contrast, the training task, the dimensionality of the layers, the number of heads, and the total number of layers  
142 modestly influenced brain scores ( $\Delta R < .08$ ).

143 Overall, these results suggest that, beyond the marginal effects of the models' architecture, the middle - but not the  
144 input and output - layers of deep language models converge towards brain-like representations.

### 145 3 Discussion

146 Do modern algorithms learn to process information in a way that leads them to mimic the computations of the human  
147 brain? Following recent achievements (45; 46; 47; 39; 40; 41; 14; 35; 48; 3; 49), we address this challenge on the  
148 restricted issue of sentence processing, by evaluating whether the activations of a large variety of neural networks  
149 linearly map onto those of 102 human brains, each recorded with MEG and fMRI during an isolated sentence reading  
150 task.

151 We found that the similarity between brains and artificial neural networks mainly depends on the language modeling  
152 accuracy of the latter, and is predominantly driven by their middle layers. This result extends recent fMRI (33; 34; 35)  
153 MEG (32; 50) and ECoG findings (51; 52), showing that pretrained language models linearly map onto the brain  
154 responses to English narratives. Our analyses provide a precise description of the spatio-temporal dynamics underlying  
155 linguistic processes. First, we confirm the sequential generation of visual and lexical representations in the fusiform  
156 gyrus (Video 2) predicted by reading theories (12; 53; 54). Second, we confirm with isolated and written sentences  
157 (and thus devoid of narrative or prosody contours) that word embeddings correlate with a large fronto-temporo-parietal  
158 network, and reveal their remarkably sustained effects (24; 33; 35). Third, the compositional representations of deep  
159 language models peaked precisely in the brain regions traditionally associated with high-level sentence processing  
160 (55; 13; 56). Finally, we subsume previous results based on average responses showing that language composition  
161 significantly recruits both hemispheres even though these effects are left-lateralized (57; 58).

162 Most of the correlation scores reported in the present study are very low. This phenomenon likely results from our use  
163 of single sample encoding analysis. These effects, however, appear to be within the range obtained with noise ceiling  
164 estimates. While the unusually large number of words and subjects in the analysis allows for a high level of statistical  
165 significance, our results emphasize the major limitations of neuroimaging imposed by signal-to-noise ratio.

166 The convergence observed between brains and deep language models follows a nontrivial pattern. The convergence  
167 of middle layers to brain-like representations is partly expected: middle layers have been shown to linearly encode  
168 syntactic trees (59) and co-references (60; 61). However, input and output layers ultimately diverged away from brain  
169 responses. This result surprised us, especially because word embeddings have been repeatedly used to model brain  
170 activity (24; 26; 14). This phenomenon begs the question whether language models learn to *combine* words - as opposed  
171 to *represent* them - similarly to humans.

172 In any case, the convergence of deep language models to brain-like computations is undoubtedly partial. First, modern  
173 language models are still far from human-level performance on a variety of tasks such as dialogue, summarization, and  
174 systematic generalization (62; 63). Second, the size of their training corpora can be incommensurately larger than what  
175 a human may be to read in his or her lifetime (10). Third, the architecture of the popular transformer network (7) is  
176 in many ways *not* biologically plausible: while the brain has been repeatedly associated with a *recurrent* predictive  
177 coding architecture, where prediction errors are computed at each level of an interconnected hierarchy of recurrent  
178 networks (64), transformers are *feedforward* neural networks that access an unreasonably large buffer of words, and  
179 only minimize prediction errors at their final "predicted word" layer. In light of these major differences, it is all-the-more  
180 remarkable to see that brains and artificial neural networks find a partially common solution to language processing.

181 Representations were here modeled for each contextualized word independently. However, the precise nature of  
182 these representations, both in the brain and in artificial neural networks, is here only coarsely categorized into three  
183 hierarchical levels. How the mind builds and organizes its lexicon, how it parses and manipulates sentences, how it  
184 plans and memorizes narratives, and perhaps above all, how it learns to achieve all these skills remain open questions.  
185 Nevertheless, the present study shows how the comparative study of brains and artificial neural networks may help  
186 test the hypothesis, according to which a simple learning objective – predicting words from their context – suffices to  
187 explain how the human brain came to form the peculiar structures of language.

## 188 **4 Methods**

189 We assessed the similarity between (i) the activations of deep neural networks and (ii) those of the brain of 100 subjects,  
190 measured with magneto-encephalography (MEG) and functional magnetic resonance imaging (fMRI), when the two  
191 were input with the same 400 isolated sentences.

### 192 **4.1 Deep Neural Networks**

#### 193 **4.1.1 Visual Convolutional Neural Network**

194 To model visual representations, every word presented to the subjects was rendered on a gray 100 x 32 pixel background  
195 with a centered black Arial font, and input to a VGG network pretrained to recognize words from images (42), resulting  
196 in an 888-dimensional embedding. This embedding was used to replicate and extend previous work on the similarity  
197 between visual neural networks activations and brain responses to the same images (e.g. (45; 39; 40)).

#### 198 **4.1.2 Language Transformers**

199 To model word and sentence representations, we trained a variety of transformers (7), input them with the same  
200 sentences that the subject read and extracted the corresponding activations from each layer. We always extract activation  
201 in a "causal" way: for example, given the sentence 'THE CAT IS ON THE MAT', the brain response to 'ON' would  
202 be solely compared to the activations of the transformer input with 'THE CAT IS ON', and extracted from the 'ON'  
203 contextualized embeddings. Word embeddings and contextualized embeddings were generated for every word, by  
204 generating word sequences from the three previous sentences. We did not observe qualitatively different results when  
205 using longer contexts. Note that the sentences were isolated, and were not part of a narrative.

206 In total, we investigated 32 distinct architectures varying dimensionality ( $\in [128, 256, 512]$ ), number of layers ( $\in$   
207  $[4, 8, 12]$ ), attention heads ( $\in [4, 8]$ ) and training task ("causal" language modeling and "masked" language modeling).  
208 While "causal" language transformers are trained to predict a word from its previous context, "masked" language  
209 transformers predict randomly masked words from a surrounding context. We froze the networks at  $\approx 100$  training  
210 stages (log distributed between 0 and 4,5M gradient updates, which corresponds to  $\approx 35$  passes over the full corpus),  
211 resulting in 3,600 networks in total, and 32,400 word representations (one per layer). Training was early-stopped when  
212 the networks' performance did not improve after 5 epochs on a validation set. Therefore, the number of frozen steps  
213 varied between 96 and 103 depending on the training length.

214 The algorithms were trained using XLM implementation <sup>1</sup> (9), on the same Wikipedia corpus of 278,386,651 words  
215 extracted using WikiExtractor <sup>2</sup> and pre-processed using Moses tokenizer (65), with punctuation. We restricted the  
216 vocabulary to the 50,000 most frequent words, concatenated with all words used in the study (50,341 vocabulary words  
217 in total). These design choices enforce that the difference in brain scores observed across models cannot be explained  
218 by differences in corpora and text preprocessing.

219 To evaluate the language processing performance of the networks, we computed their performance (top-1 accuracy on  
220 word prediction given the context) using a test dataset of 180,883 words from Wikipedia.

---

<sup>1</sup>Algorithms were trained each on 8 GPUs using early stopping with training perplexity criteria, 16 streams per batch, 128 words per stream, epoch size of 200 000 streams, 0.1 dropout, 0.1 attention dropout, gelu activation, inverse (sqrt) adam optimizer with learning rate 0.0001, 0.01 weight decay.

<sup>2</sup><https://github.com/attardi/wikiextractor>

## 221 4.2 Neuroimaging

### 222 4.2.1 Protocol

223 One-hundred and two native Dutch right-handed speakers performed a reading task while being recorded, by Schoffelen  
224 and colleagues, with a CTF magneto-encephalography (MEG) and, in a separate session, with a SIEMENS Trio 3T  
225 Magnetic Resonance scanner (36).

226 Words were flashed one at a time with a mean duration of 351 ms (ranging from 300 to 1400 ms), separated with a  
227 300ms blank screen, and grouped into sequences of 9 - 15 words, for a total of approximately 2,700 words per subject.  
228 Sequences were separated by a 5s-long blank screen. We restricted our study to meaningful sentences (400 distinct  
229 sentences in total, 120 per subject). Twenty percent of the sentences were followed by a yes/no question (e.g. "Did  
230 grandma give a cookie to the girl?") to ensure that subjects were paying attention. Sentences were grouped into blocks  
231 of five sequences. This grouping was used for cross-validation to avoid information leakage between train and test sets.

### 232 4.2.2 Magnetic Resonance Imaging (MRI)

233 Structural images were acquired with a T1-weighted magnetization-prepared rapid gradient-echo (MP-RAGE) pulse  
234 sequence. The full acquisition details, available in (36), are here summarized for simplicity: TR=2,300 ms, TE=3.03  
235 ms, 8 degree flip-angle, 1 slab, slice-matrix size=256x256, slice thickness=1 mm, field of view=256 mm, isotropic  
236 voxel-size=1.0x1.0x1.0 mm. Structural images were defaced by Schoffelen and colleagues. Preprocessing of the  
237 structural MRI was performed with Freesurfer (66), using the `recon-all` pipeline and a manual inspection of the  
238 cortical segmentations. Region-of-interest analyses were selected from the PALS Brodmann' area atlas (67) and the  
239 Destrieux Atlas segmentation (68).

240 Functional images were acquired with a T2\*-weighted functional echo planar blood oxygenation level dependent  
241 (EPI-BOLD) sequence. The full acquisition details, available in (36), are here summarized for simplicity: TR=2.0  
242 seconds, TE=35ms, flip angle=90 degrees, anisotropic voxel size=3.5x3.5x3.0 mm extracted from 29 oblique slices.  
243 fMRI was preprocessed with fMRIPrep with default parameters (69). The resulting BOLD times series were detrended  
244 and de-confounded from 18 variables (the 6 estimated head-motion parameters (`transx,y,z, rotx,y,z`) as well as the first  
245 6 noise components calculated using anatomical CompCorr (70) and 6 DCT-basis regressors using Nilearn's `clean_img`  
246 pipeline and otherwise default parameters (71). The resulting volumetric data lying along a 3mm "line" orthogonal to  
247 the mid-thickness surface were linearly projected to the corresponding vertices. The resulting surface projections were  
248 spatially decimated by 10, and are hereafter referred to as voxels, for simplicity. Finally, each group of 5 sentences were  
249 separately and linearly detrended. Note that our cross-validation never splits such groups of five consecutive sentences  
250 between the train and test sets. Two subjects were excluded from the fMRI analyses because of difficulties processing  
251 the metadata, resulting in 100 fMRI subjects.

### 252 4.2.3 Magneto-encephalography (MEG)

253 The MEG time series were pre-processed using MNE-Python and its default parameters except when specified (72).  
254 Signals were band-passed filtered between 0.1 and 40 Hz filtered, spatially corrected with a Maxwell Filter, clipped  
255 between the 0.01<sup>st</sup> and 99.99<sup>th</sup> percentiles, segmented between -500 ms to +2,000 ms relative to word onset and  
256 baseline-corrected before t=0. Reference channels and non-MEG channels were excluded from subsequent analyses,  
257 hence leading to 273 MEG channels per subject. We manually co-referenced (i) the skull segmentation of subjects'  
258 anatomical MRI with (ii) the head markers digitized prior to MEG acquisition. A single-layer forward model was made.  
259 Because of lack of empty-room recordings, the noise covariance matrix used for the inverse operator was estimated  
260 from the zero-centered 200ms of baseline MEG activity preceding word onset. Subjects' source space inverse operators  
261 were computed using a dSPRM. The average brain responses displayed in Figure 1D were computed as the square  
262 of the average evoked related field across all words for each subject separately, averaged across subjects and finally  
263 divided by their respective maxima, to highlight temporal differences. Video 1 displays the average sources without  
264 normalization. Seven subjects were excluded from the MEG analyses because of difficulties processing the metadata,  
265 resulting in 92 MEG subjects.

## 266 4.3 Noise Ceiling: Brain → Brain mapping

267 To estimate the amount of explainable signals in each MEG and each fMRI recordings, we trained and evaluated,  
268 through cross-validation, a linear mapping model  $W$  to predict the brain responses of a given subject to a sentence  
269  $Y$  from the aggregated brain responses of all other subjects who read the same sentence  $X$ . Specifically, five cross-  
270 validation splits were implemented across 5-sentence blocks with scikit-learn 'GroupKFold' (73). For each word of  
271 each sentence  $i$ , all but one subject who read the corresponding sentence were averaged with one another to form



272 a template brain response:  $x_i \in \mathbb{R}^n$  with  $n$  the number of MEG channels or fMRI voxels, as well as a target brain  
273 response  $y_i \in \mathbb{R}^n$  corresponding to the remaining subject.  $X$  and  $Y$  were normalized (mean=0, std=1) across sentences  
274 for each spatio-temporal dimension, using a robust scaler clipping below and above the 0.01<sup>st</sup> and 99.99<sup>th</sup> percentiles,  
275 respectively. A linear mapping  $W \in \mathbb{R}^{n \times n}$  was then fit with a ridge regression to best predict  $Y$  from  $X$  on the train  
276 set:

$$W = (X_{train}^T X_{train} + \lambda I)^{-1} X_{train}^T Y_{train} \quad (1)$$

277 with  $\lambda$  the  $l_2$  regularization parameter, chosen amongst 20 values log-spaced between  $10^{-3}$  and  $10^8$  with nested  
278 leave-one-out cross-validation for each dimension separately. Brain predictions  $\hat{Y} = WX$  were evaluated with a  
279 Pearson correlation on the test set:

$$R = \text{corr}(Y_{test}, \hat{Y}_{test}) \quad (2)$$

280 For the MEG source noise estimate, the correlation was also performed after source projection:

$$R = \text{corr}(KY_{test}, K\hat{Y}_{test}) \quad (3)$$

281 with  $K \in \mathbb{R}^{n \times m}$  the inverse operator projecting the  $n$  MEG sensors onto  $m$  sources. Correlation scores were finally  
282 averaged across cross-validation splits for each subject.

#### 283 4.4 Similarity: Network $\rightarrow$ Brain mapping

284 To estimate the functional similarity between artificial neural networks and each brain, we followed the same analytical  
285 pipeline used for noise ceiling, but replace  $X$  with the activations of the deep learning models. Specifically, using the  
286 same cross-validation, and for each subject separately, we trained a linear mapping  $W \in \mathbb{R}^{o, n}$  with  $o$  the number of  
287 activations, to predict brain responses  $Y$  from the network activations  $X$ .  $X$  was normalized across words (mean=0,  
288 std=1).

289 To account for the hemodynamic delay between word onset and the BOLD response recorded in fMRI, we used a finite  
290 impulse response (FIR) model with five delays (from 2 to 10 seconds) to build  $X^*$  from  $X$ .  $W$  was found using the  
291 same ridge regression described above, and evaluated with the same correlation scoring procedure. The resulting brain  
292 correlation scores measure the linear relationship between the brain signals of one subject (measured either by MEG or  
293 fMRI) and the activations of one artificial neural network (e.g a word embedding). For MEG, we simply fit and evaluate  
294 the model activations  $X$  at each time sample independently.

295 In principle, one may orthogonalize low-level representations (e.g. visual features) from high-level network models (e.g.  
296 language model), to separate the specific contribution of each type of model. This is because middle layers have access  
297 to the word-embedding layer, and can, in principle, simply copy some of its activations. Similarly, word embedding  
298 can implicitly contain visual information: e.g. frequent words tend to be visually smaller than rare ones. In our case,  
299 however, the middle layers of transformers were much better than word embeddings, and word embedding were much  
300 better than visual embeddings. To quantify the gain  $\Delta R$  achieved by a higher-level model  $M_1$  (e.g. the middle layers of  
301 a transformer) and a lower level model  $M_2$  (e.g. a word embedding) we thus simply compare the difference of their  
302 encoding scores:

$$\Delta R_{M_1} = R_{M_1} - R_{M_2} \quad (4)$$

##### 303 4.4.1 Convergence analysis

304 All neural networks but the visual CNN were trained from scratch on the same corpus (cf. 4.1.2). We systematically  
305 computed the brain scores of their activations on each subject, sensor (and time sample in the case of MEG) inde-  
306 pendently. For computational reasons, we restricted model comparison on MEG encoding scores to ten time samples  
307 regularly distributed between [0, 2]s. Brain scores were then averaged across spatial dimensions (i.e. MEG channels or  
308 fMRI surface voxels), time samples and subjects to obtain the results in Figure 3. To evaluate the convergence of a  
309 model, we computed, for each subject separately, the correlation between (1) the average brain score of each network  
310 and (2) its performance or its training step. Positive and negative correlations indicate convergence and divergence  
311 respectively. Brain scores above 0 before training indicate a fortuitous relationship between the activations of the brain  
312 and those of the networks.

##### 313 4.4.2 Feature importance

314 To systematically quantify how the architecture, the accuracy and the learning of the artificial neural networks impacted  
315 their ability to linearly correlate with brain activity, we fitted, for each subject separately, a random forest across the  
316 models' properties to predict their brain scores, using scikit-learn's RandomForest (44; 73). Specifically, we input the

317 following features to the random forest: the training task (causal language modeling vs. masked language modeling),  
318 the number of attention heads  $\in [4, 8]$ , total number of layers  $\in [4, 8, 12]$ , dimensionality  $\in [128, 256, 512]$ , training  
319 step (number of gradient updates,  $\in [0, 4.5M]$ , accuracy and the relative layer position of the representation (between 0  
320 the first layer and 1 the last layer). The performance of the random forests was evaluated with a Pearson correlation  $R$   
321 using a five-split cross-validation across models, for each subject separately.

322 "Feature importance" summarizes how each of the covarying properties of the models (their task, their architecture,  
323 etc) specifically impacts on brain scores. Feature importance is quantified with  $\Delta R$ : the decrease in  $R$  when shuffling  
324 one feature (using 50 repetitions). For each subject, we reported the average decrease across the cross-validation splits  
325 (Figure 3). The resulting scores ( $\Delta R$ ) are expected to be centered around 0 if the corresponding feature does not impact  
326 brain score (even if it is indirectly correlated with it), and positive otherwise.

## 327 4.5 Population statistics

328 To estimate the robustness of our results, we systematically performed second-level analyses across subjects. Specifically,  
329 we applied Wilcoxon signed-rank tests across subjects' estimates to evaluate whether the effect under consideration was  
330 systematically different from the chance level. The p-values of individual voxel/source/time samples were corrected for  
331 multiple comparison, using a False Discovery Rate (Benjamini/Hochberg) as implemented in MNE-Python. Error bars  
332 and  $\pm$  refer to the standard error of the mean (SEM) interval across subjects.

## 333 4.6 Ethics

334 This study was conducted in compliance with the Helsinki Declaration. No experiments on living beings were performed  
335 for this study. These data were provided (in part) by the Donders Institute for Brain, Cognition and Behaviour after  
336 having been approved by the local ethics committee (CMO – the local "Committee on Research Involving Human  
337 Subjects" in the Arnhem-Nijmegen region).

## 338 5 Acknowledgement

339 This work was supported by ANR-17-EURE-0017, the Fyssen Foundation, and the Bettencourt Foundation to JRK for  
340 his work at PSL.

## 341 References

- 342 [1] Ella Bingham and Heikki Mannila. Random projection in dimensionality reduction: applications to image and  
343 text data. In *Proceedings of the seventh ACM SIGKDD international conference on Knowledge discovery and*  
344 *data mining*, pages 245–250, 2001.
- 345 [2] Jonathan Frankle and Michael Carbin. The lottery ticket hypothesis: Finding sparse, trainable neural networks.  
346 *arXiv preprint arXiv:1803.03635*, 2018.
- 347 [3] Daniel LK Yamins and James J DiCarlo. Using goal-driven deep learning models to understand sensory cortex.  
348 *Nature neuroscience*, 19(3):356, 2016.
- 349 [4] Alan M Turing. Computing machinery and intelligence. In *Parsing the Turing Test*, pages 23–65. Springer, 2009.
- 350 [5] Noam Chomsky. *Language and mind*. Cambridge University Press, 2006.
- 351 [6] Stanislas Dehaene, LE Yann, and Jacques Girardon. *La plus belle histoire de l'intelligence: des origines aux*  
352 *neurones artificiels: vers une nouvelle étape de l'évolution*. Robert Laffont, 2018.
- 353 [7] Ashish Vaswani, Noam Shazeer, Niki Parmar, Jakob Uszkoreit, Llion Jones, Aidan N. Gomez, Lukasz Kaiser, and  
354 Illia Polosukhin. Attention is all you need. In *NIPS*, 2017.
- 355 [8] Jacob Devlin, Ming-Wei Chang, Kenton Lee, and Kristina Toutanova. BERT: pre-training of deep bidirectional  
356 transformers for language understanding. *CoRR*, abs/1810.04805, 2018.
- 357 [9] Guillaume Lample and Alexis Conneau. Cross-lingual language model pretraining. *Advances in Neural Informa-*  
358 *tion Processing Systems (NeurIPS)*, 2019.
- 359 [10] Tom B Brown, Benjamin Mann, Nick Ryder, Melanie Subbiah, Jared Kaplan, Prafulla Dhariwal, Arvind Nee-  
360 lakantan, Pranav Shyam, Girish Sastry, Amanda Askell, et al. Language models are few-shot learners. *arXiv*  
361 *preprint arXiv:2005.14165*, 2020.
- 362 [11] Cathy J Price. The anatomy of language: a review of 100 fmri studies published in 2009. *Annals of the new York*  
363 *Academy of Sciences*, 1191(1):62–88, 2010.

- 364 [12] Stanislas Dehaene and Laurent Cohen. The unique role of the visual word form area in reading. *Trends in cognitive*  
365 *sciences*, 15(6):254–262, 2011.
- 366 [13] Gregory Hickok and David Poeppel. The cortical organization of speech processing. 8(5):393–402, 2007. Number:  
367 5 Publisher: Nature Publishing Group.
- 368 [14] Alexander G. Huth, Wendy A. de Heer, Thomas L. Griffiths, Frédéric E. Theunissen, and Jack L. Gallant. Natural  
369 speech reveals the semantic maps that tile human cerebral cortex. 532(7600):453–458, 2016.
- 370 [15] Aakash Agrawal, KVS Hari, and SP Arun. A compositional neural code in high-level visual cortex can explain  
371 jumbled word reading. *Elife*, 9:e54846, 2020.
- 372 [16] Peter Hagoort. On broca, brain, and binding: a new framework. *Trends in Cognitive Sciences*, 9:416–423, 2005.
- 373 [17] Francis Mollica, Matthew Siegelman, Evgeniia Diachek, Steven T. Piantadosi, Zachary Mineroff, Richard Futrell,  
374 Hope Kean, Peng Qian, and Evelina Fedorenko. Composition is the core driver of the language-selective network.  
375 1(1):104–134. Publisher: MIT Press.
- 376 [18] Evelina Fedorenko, Idan Blank, Matthew Siegelman, and Zachary Mineroff. Lack of selectivity for syntax relative  
377 to word meanings throughout the language network. *bioRxiv*, page 477851, 2020.
- 378 [19] Stanislas Dehaene, Laurent Cohen, Mariano Sigman, and Fabien Vinckier. The neural code for written words: a  
379 proposal. 9(7):335–341.
- 380 [20] Yoshua Bengio, Réjean Ducharme, and Pascal Vincent. A neural probabilistic language model. In T. K. Leen,  
381 T. G. Dietterich, and V. Tresp, editors, *Advances in Neural Information Processing Systems 13*, pages 932–938.  
382 MIT Press, 2003.
- 383 [21] Tomas Mikolov, Kai Chen, Greg Corrado, and Jeffrey Dean. Efficient estimation of word representations in vector  
384 space. 2013.
- 385 [22] Jeffrey Pennington, Richard Socher, and Christopher D. Manning. Glove: Global vectors for word representation.  
386 In *Empirical Methods in Natural Language Processing (EMNLP)*, pages 1532–1543, 2014.
- 387 [23] Piotr Bojanowski, Edouard Grave, Armand Joulin, and Tomas Mikolov. Enriching word vectors with subword  
388 information. *arXiv preprint arXiv:1607.04606*, 2016.
- 389 [24] T. M. Mitchell, S. V. Shinkareva, A. Carlson, K.-M. Chang, V. L. Malave, R. A. Mason, and M. A. Just. Predicting  
390 human brain activity associated with the meanings of nouns. 320(5880):1191–1195, 2008.
- 391 [25] Andrew James Anderson, Edmund C. Lalor, Feng Lin, Jeffrey R. Binder, Leonardo Fernandino, Colin J. Humphries,  
392 Lisa L. Conant, Rajeev D. S. Raizada, Scott Grimm, and Xixi Wang. Multiple regions of a cortical network  
393 commonly encode the meaning of words in multiple grammatical positions of read sentences. 29(6):2396–2411,  
394 2019. Publisher: Oxford Academic.
- 395 [26] Jona Sassenhagen and Christian J. Fiebach. Traces of meaning itself: Encoding distributional word vectors in  
396 brain activity. *bioRxiv*, 2019.
- 397 [27] Subba Reddy Oota, Naresh Manwani, and Bapi Raju S. fMRI Semantic Category Decoding using Linguistic  
398 Encoding of Word Embeddings. *arXiv e-prints*, page arXiv:1806.05177, Jun 2018.
- 399 [28] Samira Abnar, Rasyan Ahmed, Max Mijnheer, and Willem H. Zuidema. Experiential, distributional and  
400 dependency-based word embeddings have complementary roles in decoding brain activity. *CoRR*, abs/1711.09285,  
401 2017.
- 402 [29] Yu-Ping Ruan, Zhen-Hua Ling, and Yu Hu. Exploring semantic representation in brain activity using word  
403 embeddings. In *Proceedings of the 2016 Conference on Empirical Methods in Natural Language Processing*,  
404 pages 669–679, Austin, Texas, November 2016. Association for Computational Linguistics.
- 405 [30] Christian Brodbeck, L Elliot Hong, and Jonathan Z Simon. Rapid transformation from auditory to linguistic  
406 representations of continuous speech. *Current Biology*, 28(24):3976–3983, 2018.
- 407 [31] Jon Gauthier and Anna Ivanova. Does the brain represent words? an evaluation of brain decoding studies of  
408 language understanding. *arXiv preprint arXiv:1806.00591*, 2018.
- 409 [32] Leila Wehbe, Ashish Vaswani, Kevin Knight, and Tom Mitchell. Aligning context-based statistical models of  
410 language with brain activity during reading. In *Proceedings of the 2014 Conference on Empirical Methods in Nat-*  
411 *ural Language Processing (EMNLP)*, pages 233–243, Doha, Qatar, October 2014. Association for Computational  
412 Linguistics.
- 413 [33] Shailee Jain and Alexander Huth. Incorporating context into language encoding models for fmri. In S. Bengio,  
414 H. Wallach, H. Larochelle, K. Grauman, N. Cesa-Bianchi, and R. Garnett, editors, *Advances in Neural Information*  
415 *Processing Systems 31*, pages 6628–6637. Curran Associates, Inc., 2018.

- 416 [34] Nikos Athanasiou, Elias Iosif, and Alexandros Potamianos. Neural activation semantic models: Computational  
417 lexical semantic models of localized neural activations. In *Proceedings of the 27th International Conference*  
418 *on Computational Linguistics*, pages 2867–2878, Santa Fe, New Mexico, USA, August 2018. Association for  
419 Computational Linguistics.
- 420 [35] Mariya Toneva and Leila Wehbe. Interpreting and improving natural-language processing (in machines) with  
421 natural language-processing (in the brain). *CoRR*, abs/1905.11833, 2019.
- 422 [36] Jan-Mathijs Schoffelen, Robert Oostenveld, Nietzsche Lam, Julia Udden, Annika Hultén, and Peter Hagoort. A  
423 204-subject multimodal neuroimaging dataset to study language processing. *Scientific Data*, 6, 12 2019.
- 424 [37] Peter Hagoort. The neurobiology of language beyond single-word processing. *Science*, 366(6461):55–58, 2019.
- 425 [38] Evelina Fedorenko, Terri L Scott, Peter Brunner, William G Coon, Brianna Pritchett, Gerwin Schalk, and Nancy  
426 Kanwisher. Neural correlate of the construction of sentence meaning. *Proceedings of the National Academy of*  
427 *Sciences*, 113(41):E6256–E6262, 2016.
- 428 [39] Nikolaus Kriegeskorte. Deep neural networks: a new framework for modeling biological vision and brain  
429 information processing. *Annual review of vision science*, 1:417–446, 2015.
- 430 [40] Umut Güçlü and Marcel AJ van Gerven. Deep neural networks reveal a gradient in the complexity of neural  
431 representations across the ventral stream. *Journal of Neuroscience*, 35(27):10005–10014, 2015.
- 432 [41] Michael Eickenberg, Alexandre Gramfort, Gaël Varoquaux, and Bertrand Thirion. Seeing it all: Convolutional  
433 network layers map the function of the human visual system. *NeuroImage*, 152:184–194, 2017.
- 434 [42] Jeonghun Baek, Geewook Kim, Junyeop Lee, Sungrae Park, Dongyoon Han, Sangdoon Yun, Seong Joon Oh, and  
435 Hwalsuk Lee. What is wrong with scene text recognition model comparisons? dataset and model analysis. In  
436 *Proceedings of the IEEE International Conference on Computer Vision*, pages 4715–4723, 2019.
- 437 [43] Anna Seydell-Greenwald, Xiaoying Wang, Elissa Newport, Yanchao Bi, and Ella Striem-Amit. Spoken language  
438 comprehension activates the primary visual cortex. *bioRxiv*, 2020.
- 439 [44] Leo Breiman. Random forests. 45(1):5–32, 2001.
- 440 [45] Daniel LK Yamins, Ha Hong, Charles F Cadieu, Ethan A Solomon, Darren Seibert, and James J DiCarlo.  
441 Performance-optimized hierarchical models predict neural responses in higher visual cortex. *Proceedings of the*  
442 *National Academy of Sciences*, 111(23):8619–8624, 2014.
- 443 [46] Hanlin Tang, Martin Schrimpf, William Lotter, Charlotte Moerman, Ana Paredes, Josue Ortega Caro, Walter  
444 Hardesty, David Cox, and Gabriel Kreiman. Recurrent computations for visual pattern completion. *Proceedings*  
445 *of the National Academy of Sciences*, 115(35):8835–8840, 2018.
- 446 [47] Seyed-Mahdi Khaligh-Razavi and Nikolaus Kriegeskorte. Deep supervised, but not unsupervised, models may  
447 explain it cortical representation. *PLoS computational biology*, 10(11):e1003915, 2014.
- 448 [48] Alexander Kell, Daniel Yamins, Erica Shook, Sam Norman-Haignere, and Josh McDermott. A task-optimized  
449 neural network replicates human auditory behavior, predicts brain responses, and reveals a cortical processing  
450 hierarchy. *Neuron*, 98, 04 2018.
- 451 [49] Andrew Saxe, Stephanie Nelli, and Christopher Summerfield. If deep learning is the answer, what is the question?  
452 *Nature Reviews Neuroscience*, pages 1–13, 2020.
- 453 [50] Micha Heilbron, Kristijan Armeni, Jan-Mathijs Schoffelen, Peter Hagoort, and Floris P de Lange. A hierarchy of  
454 linguistic predictions during natural language comprehension. *bioRxiv*, 2020.
- 455 [51] Ariel Goldstein, Zaid Zada, Eliav Buchnik, Mariano Schain, Amy Price, Bobbi Aubrey, Samuel A Nastase, Amir  
456 Feder, Dotan Emanuel, Alon Cohen, et al. Thinking ahead: prediction in context as a keystone of language in  
457 humans and machines. *bioRxiv*, 2020.
- 458 [52] Martin Schrimpf, Idan Blank, Greta Tuckute, Carina Kauf, Eghbal A Hosseini, Nancy Kanwisher, Joshua  
459 Tenenbaum, and Evelina Fedorenko. Artificial neural networks accurately predict language processing in the  
460 brain. *BioRxiv*, 2020.
- 461 [53] Dora Hermes, Vinitha Rangarajan, Brett L Foster, Jean-Remi King, Itir Kasikci, Kai J Miller, and Josef Parvizi.  
462 Electrophysiological responses in the ventral temporal cortex during reading of numerals and calculation. *Cerebral*  
463 *cortex*, 27(1):567–575, 2017.
- 464 [54] Oscar Woolnough, Cristian Donos, Patrick S Rollo, Kiefer James Forseth, Yair Lakretz, Nathan E Crone, Simon  
465 Fischer-Baum, Stanislas Dehaene, and Nitin Tandon. Spatiotemporal dynamics of orthographic and lexical  
466 processing in the ventral visual pathway. *bioRxiv*, 2020.

- 467 [55] Christophe Pallier, Anne-Dominique Devauchelle, and Stanislas Dehaene. Cortical representation of the constituent  
468 structure of sentences. *Proceedings of the National Academy of Sciences*, 108(6):2522–2527, 2011.
- 469 [56] Jonathan R Brennan and Liina Pyllkänen. Meg evidence for incremental sentence composition in the anterior  
470 temporal lobe. *Cognitive science*, 41:1515–1531, 2017.
- 471 [57] Evelina Fedorenko, Po-Jang Hsieh, Alfonso Nieto-Castañón, Susan Whitfield-Gabrieli, and Nancy Kanwisher.  
472 New method for fmri investigations of language: defining rois functionally in individual subjects. *Journal of*  
473 *neurophysiology*, 104(2):1177–1194, 2010.
- 474 [58] Gregory B Cogan, Thomas Thesen, Chad Carlson, Werner Doyle, Orrin Devinsky, and Bijan Pesaran. Sensory–  
475 motor transformations for speech occur bilaterally. *Nature*, 507(7490):94–98, 2014.
- 476 [59] Christopher D. Manning, Kevin Clark, John Hewitt, Urvashi Khandelwal, and Omer Levy. Emergent linguistic  
477 structure in artificial neural networks trained by self-supervision. page 201907367, 2020.
- 478 [60] Ganesh Jawahar, Benoît Sagot, and Djamé Seddah. What does BERT learn about the structure of language? In  
479 *ACL 2019 - 57th Annual Meeting of the Association for Computational Linguistics*, Florence, Italy, July 2019.
- 480 [61] Andy Coenen, Emily Reif, Ann Yuan, Been Kim, Adam Pearce, Fernanda Viégas, and Martin Wattenberg.  
481 Visualizing and measuring the geometry of BERT.
- 482 [62] João Loula, Marco Baroni, and Brenden M. Lake. Rearranging the familiar: Testing compositional generalization  
483 in recurrent networks. *CoRR*, abs/1807.07545, 2018.
- 484 [63] Rowan Zellers, Ari Holtzman, Yonatan Bisk, Ali Farhadi, and Yejin Choi. Hellaswag: Can a machine really finish  
485 your sentence? *arXiv preprint arXiv:1905.07830*, 2019.
- 486 [64] Karl Friston. The free-energy principle: a unified brain theory? *Nature reviews neuroscience*, 11(2):127–138,  
487 2010.
- 488 [65] Philipp Koehn, Hieu Hoang, Alexandra Birch, Chris Callison-Burch, Marcello Federico, Nicola Bertoldi, Brooke  
489 Cowan, Wade Shen, Christine Moran, Richard Zens, Chris Dyer, Ondřej Bojar, Alexandra Constantin, and Evan  
490 Herbst. Moses: Open source toolkit for statistical machine translation. In *Proceedings of the 45th Annual*  
491 *Meeting of the Association for Computational Linguistics Companion Volume Proceedings of the Demo and Poster*  
492 *Sessions*, pages 177–180. Association for Computational Linguistics.
- 493 [66] Bruce Fischl. Freesurfer. *Neuroimage*, 62(2):774–781, 2012.
- 494 [67] David C Van Essen. A population-average, landmark-and surface-based (pals) atlas of human cerebral cortex.  
495 *Neuroimage*, 28(3):635–662, 2005.
- 496 [68] Christophe Destrieux, Bruce Fischl, Anders Dale, and Eric Halgren. Automatic parcellation of human cortical  
497 gyri and sulci using standard anatomical nomenclature. *Neuroimage*, 53(1):1–15, 2010.
- 498 [69] Oscar Esteban, Christopher J Markiewicz, Ross W Blair, Craig A Moodie, A Ilkay Isik, Asier Erramuzpe, James D  
499 Kent, Mathias Goncalves, Elizabeth DuPre, Madeleine Snyder, et al. fmriprep: a robust preprocessing pipeline for  
500 functional mri. *Nature methods*, 16(1):111–116, 2019.
- 501 [70] Yashar Behzadi, Khaled Restom, Joy Liau, and Thomas T Liu. A component based noise correction method  
502 (compcor) for bold and perfusion based fmri. *Neuroimage*, 37(1):90–101, 2007.
- 503 [71] Alexandre Abraham, Fabian Pedregosa, Michael Eickenberg, Philippe Gervais, Andreas Mueller, Jean Kossaifi,  
504 Alexandre Gramfort, Bertrand Thirion, and Gaël Varoquaux. Machine learning for neuroimaging with scikit-learn.  
505 *Frontiers in neuroinformatics*, 8:14, 2014.
- 506 [72] Alexandre Gramfort, Martin Luessi, Eric Larson, Denis A. Engemann, Daniel Strohmeier, Christian Brodbeck,  
507 Lauri Parkkonen, and Matti S. Hämäläinen. Mne software for processing meg and eeg data. *NeuroImage*, 86:446 –  
508 460, 2014.
- 509 [73] Fabian Pedregosa, Gaël Varoquaux, Alexandre Gramfort, Vincent Michel, Bertrand Thirion, Olivier Grisel,  
510 Mathieu Blondel, Peter Prettenhofer, Ron Weiss, Vincent Dubourg, et al. Scikit-learn: Machine learning in python.  
511 *Journal of machine learning research*, 12(Oct):2825–2830, 2011.
